# Supplementary material for: The kallikrein–kinin pathway as a mechanism for auto-control of brown adipose tissue activity
Source: PubMed Central journal article supplement (PMC7195474; doi:10.1038/s41467-020-16009-x), 2020-05-01
Supplement: 41467_2020_16009_MOESM1_ESM.pdf [file 41467_2020_16009_MOESM1_ESM.pdf]

# **Supplementary Information**

**The kallikrein-kinin pathway as a mechanism for auto-control of  
brown adipose tissue activity**

*Peyrou et al.*

## Supplementary Methods

| Primary antibodies | Host   | Provider                       | Catalogue number |
|--------------------|--------|--------------------------------|------------------|
| UCP-1              | Rabbit | Abcam (Cambridge, UK)          | ab10983          |
| KNG1               | Rabbit | Abcam (Cambridge, UK)          | ab175386         |
| KNG2               | Rabbit | AntibodyBen (Barcelona, Spain) | -                |
| TH                 | Rabbit | Millipore (Madrid, Spain)      | ab152            |
| $\beta$ -actin     | Mouse  | Sigma Aldrich (Madrid, Spain)  | #A5441           |

| Secondary antibodies                  | Host | Provider                 | Catalogue number |
|---------------------------------------|------|--------------------------|------------------|
| HRP-conjugated anti-rabbit            | Goat | Abcam (Cambridge, UK)    | ab6721           |
| HRP-conjugated anti-mouse             | Goat | Bio-rad (Madrid, Spain)  | #1721011         |
| AlexaFluor 488-conjugated anti-rabbit | Goat | Thermo Fisher Scientific | A-11034          |

| Reagents, chemicals and Kits  | Provider                                    | Catalogue number |
|-------------------------------|---------------------------------------------|------------------|
| Nucleospin RNA                | Macherey-Nagel (Düren, Germany)             | 740955.250       |
| High capacity RNA-to-cDNA kit | Thermo Fisher Scientific (Barcelona, Spain) | 4387406          |
| Taqman Master mix             | Thermo Fisher Scientific (Barcelona, Spain) | 11743-500        |
| SYBRGreen Master mix          | Thermo Fisher Scientific (Barcelona, Spain) | 4472908          |
| PVDF membranes                | Amersham (Barcelona, Spain)                 | 10600023         |
| ECL                           | Millipore (Madrid, Spain)                   | WBKLS0500        |
| Osmotic mini-pump             | Alzet (Cupertino, CA, USA)                  | 1007D            |
| B1 antagonist R715            | Tocris (Madrid, Spain)                      | 3407/1           |
| B2 antagonist HOE 140         | Tocris (Madrid, Spain)                      | 3014             |
| Isoflurane                    | Zoetis (Madrid, Spain)                      | 571329.8         |
| dibutyryl-cAMP                | Sigma Aldrich (Madrid, Spain)               | D0627            |

|                                                                                           |                               |                 |
|-------------------------------------------------------------------------------------------|-------------------------------|-----------------|
| Norepinephrine                                                                            | Sigma Aldrich (Madrid, Spain) | A0937           |
| CL 316,243                                                                                | Sigma Aldrich (Madrid, Spain) | C5976           |
| Bradykinin acetate salt                                                                   | Sigma Aldrich (Madrid, Spain) | B3259           |
| HMWK mouse recombinant protein                                                            | R&D system (Abingdon, UK)     | RYD-2206-PI-010 |
| Dapi                                                                                      | Sigma Aldrich (Madrid, Spain) | 10236276001     |
| Rosiglitazone                                                                             | Sigma Aldrich (Madrid, Spain) | R2408           |
| PepTag® Non-Radioactive Protein Kinase Assay                                              | Promega (Madrid, Spain)       | V5340           |
| 9-Plex Multi-Pathway Total Magnetic Bead Kit 96-well Plate Cell Signaling Multiplex Assay | Millipore (Madrid, Spain)     | 48-680MAG       |
| 9-Plex Multi-Pathway Total Magnetic Bead Kit 96-well Plate Cell Signaling Multiplex Assay | Millipore (Madrid, Spain)     | 48-681MAG       |
| Pertussis Toxin                                                                           | Tocris (Madrid, Spain)        | 3097            |
| YM-254890                                                                                 | Wako (Madrid, Spain)          | 257-00631       |
| Free glycerol reagent                                                                     | Sigma Aldrich (Madrid, Spain) | F6428           |
| Glycerol standard solution                                                                | Sigma Aldrich (Madrid, Spain) | G7793           |

| <b>Taqman probes</b> | <b>Catalogue number</b> | <b>Gene Name</b> | <b>Catalogue number</b> |
|----------------------|-------------------------|------------------|-------------------------|
| <i>Ucp1</i>          | Mm00494069_m1           | <i>Angiopt1</i>  | Mm00456503_m1           |
| <i>Dio2</i>          | Mm00515664_m1           | <i>Cd31</i>      | Mm01242584_m1           |
| <i>Prdm16</i>        | Mm00712556_m1           | <i>Flt1</i>      | Mm00438980_m1           |
| <i>Ppargc1a</i>      | Mm00447183_m1           | <i>Kdr</i>       | Mm01222421_m1           |
| <i>Cebpb</i>         | Mm00843434_s1           | <i>Vegfa</i>     | Mm01281449_m1           |
| <i>Pparg</i>         | Mm00440945_m1           | <i>Mrc1</i>      | Mm00485148_m1           |
| <i>Lpl</i>           | Mm00434764_m1           | <i>B1</i>        | Mm04207315_s1           |
| <i>Glut1</i>         | Mm00441480_m1           | <i>B2</i>        | Mm00437788_s1           |
| <i>Glut4</i>         | Mm00436615_m1           | <i>Fabp4</i>     | Mm00445880_m1           |
| <i>Fas</i>           | Mm00494074_m1           | <i>Ccl2</i>      | Mm00441242_m1           |
| <i>Cd36</i>          | Mm01135198_m1           | <i>Clec10a</i>   | Mm00546124_m1           |

|                       |                         |                       |                         |
|-----------------------|-------------------------|-----------------------|-------------------------|
| <i>Dgat</i>           | Mm00515643_m1           | <i>Nos2</i>           | Mm00440502_m1           |
| <i>Lcad</i>           | Mm00599660_m1           | <i>Acox1</i>          | Mm00443579_m1           |
| <i>Mcad</i>           | Mm00431611_m1           | <i>Leptin</i>         | Mm00434759_m1           |
| <i>Adipoq</i>         | Mm00456425_m1           | <i>Cidea</i>          | Mm00432554_m1           |
| <i>Klkb1</i>          | Mm00434658_m1           | <i>Klk1</i>           | Mm00834006_g1           |
| <i>Ace</i>            | Mm00593654_cn           | <i>Knq2</i>           | Rn00754976_m1           |
| <i>Arg1</i>           | Mm00475988_m1           | <i>Knq1/1</i>         | Rn00754953_m1           |
| <i>Il6</i>            | Mm00446191_m1           | <i>Knq1</i>           | Rn01774060_m1           |
| <i>Tnf</i>            | Mm00443258_m1           |                       |                         |
| <b>Reference gene</b> | <b>Catalogue number</b> | <b>Reference gene</b> | <b>Catalogue number</b> |
| <i>18S</i>            | Hs99999901_s1           | <i>Cyclophilin</i>    | Mm02342430_m1           |

| SybrGreen             | Forward                        | Reverse                      |
|-----------------------|--------------------------------|------------------------------|
| <i>Knq1</i>           | 5'-CCTGGGGTAAAAAGTGGCAA-3'     | 5'-GGAGTAAAAGTTGGAGAGCC-3'   |
| <i>Knq2 Hmwk</i>      | 5'-GACTGCCAGAGAACAGAACC-3'     | 5'-CCTCTCCTGTATCTGTGTAGA-3'  |
| <i>Knq2 Lmwk</i>      | 5'-GCAGGAACAAGTAGGCTCCTA-3'    | 5'-CATCTCAGGATTCTTCTGCTCC-3' |
| <b>Reference gene</b> | <b>Forward</b>                 | <b>Reverse</b>               |
| <i>Rps9</i>           | 5'-GACCAGGAGCTAAAGTTGATTGGA-3' | 5'-TCTTGGCCAGGGTAAACTTGA-3'  |

Scheme of primer design sites:

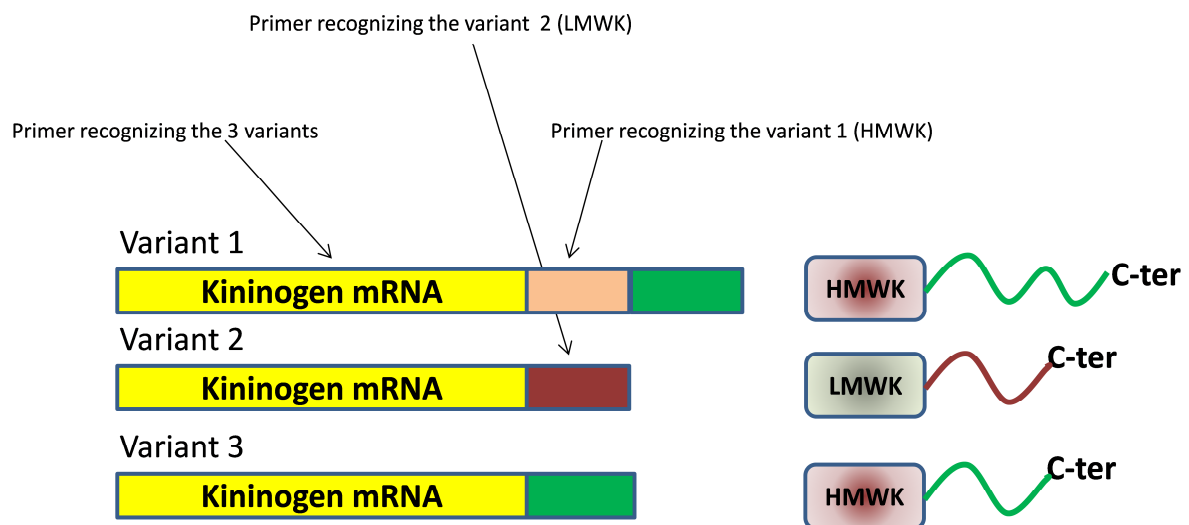

# Supplementary Figures

## Supplementary Figure 1

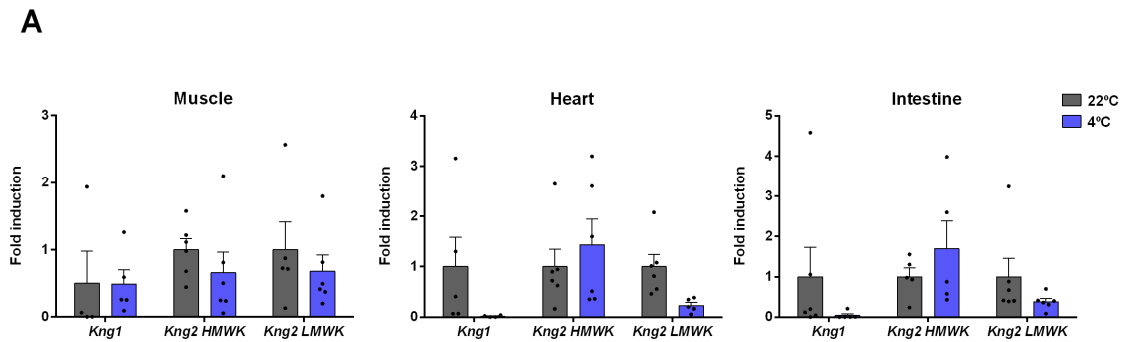

**Supplementary figure 1: Expression of Kng genes in different tissues during cold exposure.** A) mRNA expression of the different Kngs in muscle, heart, and intestine of 3 months old C57BL/6J mice (n=6 animals). Data are presented as means  $\pm$  s.e.m. (bars); two-tailed unpaired Student's t-test. Source data are provided as a Source Data file.

## Supplementary Figure 2

**A**

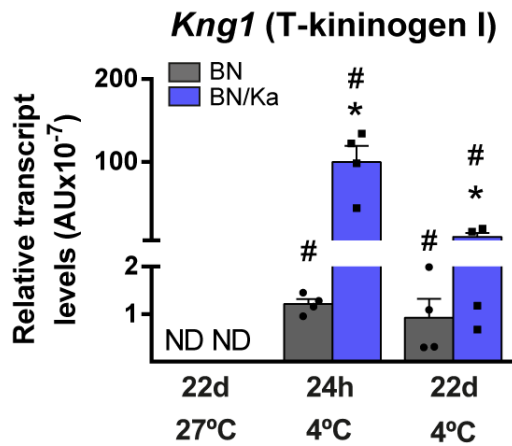

**B**

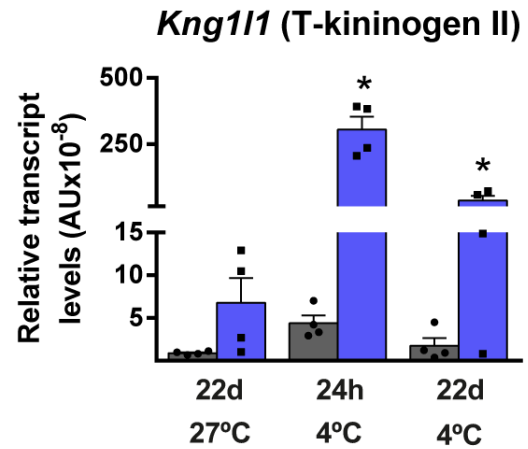

**Supplementary figure 2: Expression of Kngs in iBAT of BN/Ka rats under temperature challenges.** **A**) mRNA expression of T-kininogen I (*Kng1*) and **B**) T-kininogen II (*Kng1/1*) in iBAT from 12 weeks old WT and BN/Ka rats under thermoneutral (Tn) conditions and after 24-hours or 22-days exposure to cold (4°C) (n=4 animals). ND, not detectable. Data are presented as means  $\pm$  s.e.m. (bars). \* $P < 0.05$  versus BN; # $P < 0.05$  versus thermoneutrality.  $P$ -values determined by two-tailed unpaired Student's t-test (for genotypes) and two ways ANOVA with Tukey's post hoc test (for temperature) (**A**, **B**). Source data are provided as a Source Data file.

### Supplementary Figure 3

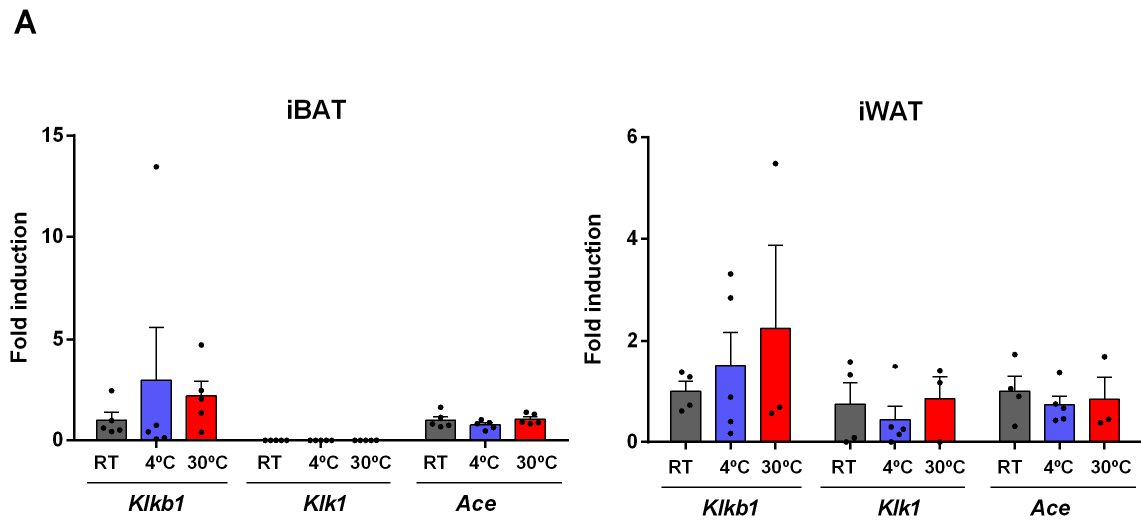

**Supplementary figure 3: Expression of other components of the kinin system in iBAT after thermogenic challenges.** A) mRNA expression of plasma kallikrein b1 (*Kikb1*), kininase 1 (*Kik1*) and angiotensin-converting enzyme (*Ace*) in iBAT and iWAT after 1 week exposition to 4°C or 30°C (n=5 animals, except for iWAT 30°C condition where n=3 and iWAT RT where n=4). Data are presented as means  $\pm$  s.e.m. (bars); one way ANOVA with Tukey's post hoc test. Source data are provided as a Source Data file.

## Supplementary Figure 4

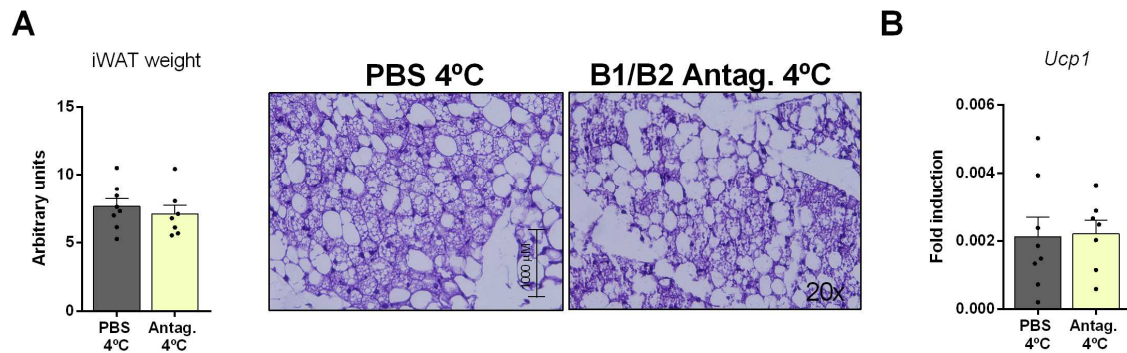

**Supplementary figure 4: Effects of local pharmacological inhibition of B1/B2 receptors on iBAT.** A) iWAT weight normalized to tibia length of WT mice exposed for 1 week to 4°C and then implanted in the back with mini-pumps delivering either PBS or a cocktail of B1 and B2 antagonists (n=8 animals for PBS and n=7 animals for antagonists); H&E-stained histological sections of iWAT. B) mRNA expression of *Ucp1* in iWAT (n=8 animals for PBS and n=7 animals for antagonists). Data are presented as means  $\pm$  s.e.m. (bars); two-tailed unpaired Student's t-test. Source data are provided as a Source Data file.



## Supplementary Figure 5

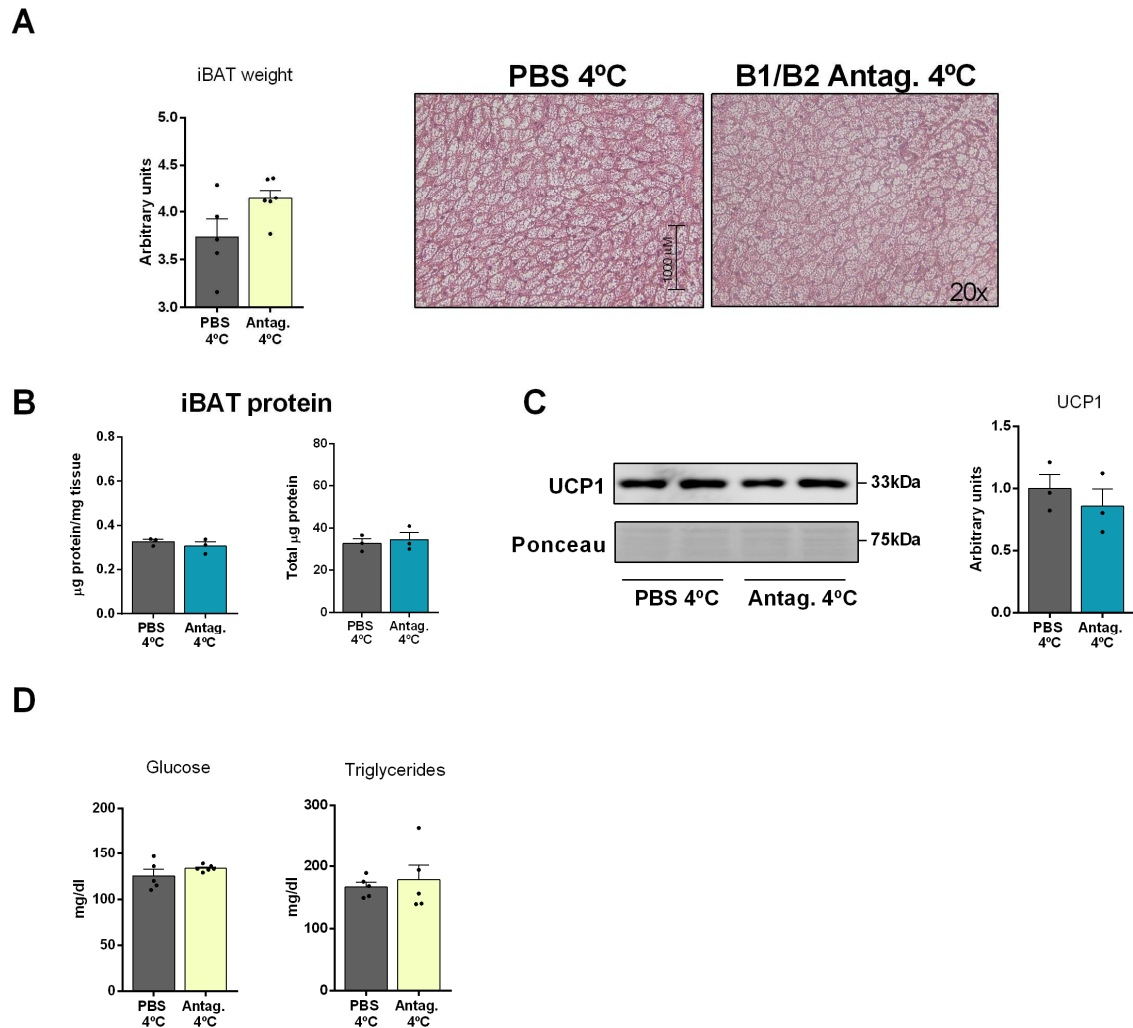

**Supplementary figure 5: Effects of local pharmacological inhibition of B1/B2 receptors on iWAT.** A) iBAT weight normalized to tibia length of WT mice exposed for 1 week to 4°C and then implanted in the leg with mini-pumps delivering either PBS or a cocktail of B1 and B2 antagonists (n=6 animals); H&E-stained histological sections of iBAT. B) Quantification of total protein per milligram of tissue and in the entire iBAT depot (n=3 animals). C) Expression and quantification of UCP1 protein (n=3 animals). D) Levels of glucose and triglycerides (n=6 animals). Data are presented as means  $\pm$  s.e.m. (bars); two-tailed unpaired Student's t-test. Source data are provided as a Source Data file.

## Supplementary Figure 6

A

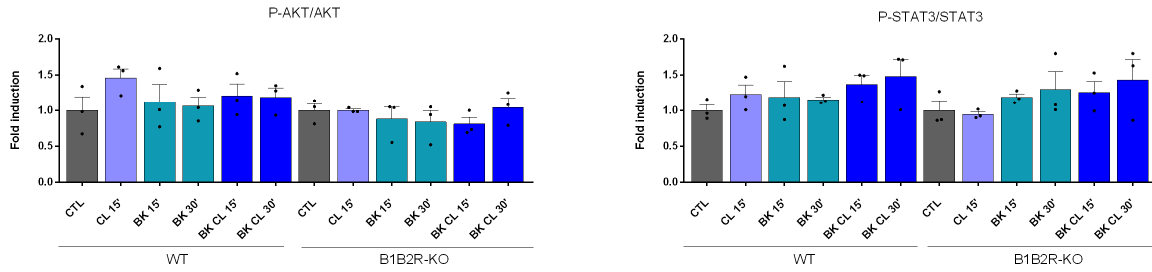

**Supplementary figure 6: Pathways involved in the regulation of thermogenesis by the Kallikrein-kinin system.** A) Phosphorylation status of AKT and STAT3 in primary WT and B1B2R-KO brown adipocytes exposed to CL316243, bradykinin or both for 15 or 30 min (n=3 independent cell culture experiments), normalized with total AKT and STAT3. Data are presented as means  $\pm$  s.e.m. (bars); one way ANOVA with Tukey's post hoc test. Source data are provided as a Source Data file.

## Supplementary Figure 7

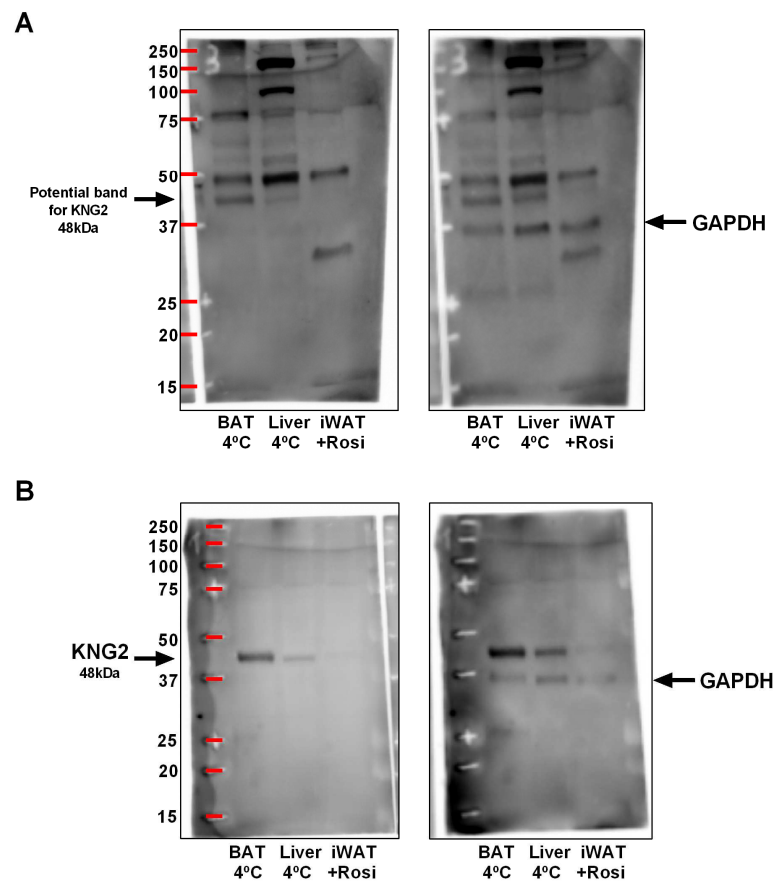

**Supplementary Figure 7: Purification of KNG2 antibody.** A) Western blot representing the profile of immunoreactivity of the crude anti-serum obtained in rabbits immunized against the specific KNG2 peptide C-Ahx-LYRVTKRAKMDGSAT-amide. The right panel corresponds to re-immunoblotting with the GAPDH antibody to show loading. B) Western blot with same tissue extracts using the specific peptide-based affinity-purified antibody. Evidence of a single band detection corresponding to the KNG2 size at 48 kDa. Relative intensity of the band in tissues is fully concordant with the *Kn2* mRNA expression in the tissue conditions quoted in Fig 1. The right panel corresponds to re-immunoblotting with the GAPDH antibody to show loading.

## Supplementary Tables

**Supplementary table 1: General and circulating parameters in BN/Ka rats.**

|                                                              | 27°C         |                      |
|--------------------------------------------------------------|--------------|----------------------|
|                                                              | BN (n=4)     | BN/Ka (n=4)          |
| Body weight (g)                                              | 274.3 ± 1.8  | 274.0 ± 1.5          |
| Food consumption (g/day/animal)                              | 24.8 ± 1.2   | 26.5 ± 2.9           |
| <b><i>Tissue weight</i></b><br>(mg of tissue/Body weight, g) |              |                      |
| iBAT                                                         | 0.86 ± 0.11  | <b>1.28 ± 0.06*</b>  |
| eWAT                                                         | 2.93 ± 0.35  | 2.84 ± 0.69          |
| Liver                                                        | 29.13 ± 0.39 | 27.55 ± 2.81         |
| <b><i>Circulating parameters</i></b>                         |              |                      |
| Glucose (mg/dl)                                              | 98.75 ± 2.06 | <b>84.5 ± 3.01**</b> |
| Insulin (ng/ml)                                              | 0.77 ± 0.08  | 0.94 ± 0.17          |
| Leptin (ng/ml)                                               | 3.20 ± 0.57  | 3.52 ± 0.99          |

12 weeks old BN and BN/Ka rats exposed to thermoneutrality (27°C) for 22 days. All measurements are means ± s.e.m. Data were analyzed by two tailed unpaired Student's t-test (\*P<0.05 when compared with BN).

## Supplementary table 2: Circulating parameters in mini-pumps inserted mice.

|                       | PBS (n=3-8) | Antagonists (n=5-7) |
|-----------------------|-------------|---------------------|
| Glucose (mg/dl)       | 150±6       | 167±10              |
| Triglycerides (mg/dl) | 170±6       | 157±12              |
| Insulin (pg/ml)       | 1226±143    | 1041±69             |
| Leptin (pg/ml)        | 609±132     | 960±166             |
| PAI1 total (pg/ml)    | 1107±223    | 1479±170            |
| Resistin (pg/ml)      | 1347±494    | 2198±145            |
| Il-6 (pg/ml)          | 13,1±3,7    | 10,6±3,9            |

9 weeks old mice were inserted subcutaneously with a mini-pump diffusing either PBS or a cocktail of B1 and B2 antagonists upon iBAT localization and then exposed to cold (4°C) for 1 week. All measurements are means ± s.e.m. Data were analyzed by two tailed unpaired Student's t-test.

**Supplementary table 3: General and circulating parameters in B1B2R-KO mice after temperature challenges.**

|                                                         | 22°C        |                              | 4°C                                    |                                                | 30°C                                   |                               |
|---------------------------------------------------------|-------------|------------------------------|----------------------------------------|------------------------------------------------|----------------------------------------|-------------------------------|
|                                                         | WT<br>(n=7) | B1B2R-KO<br>(n=7)            | WT<br>(n=8)                            | B1B2R-KO<br>(n=8)                              | WT<br>(n=5)                            | B1B2R-KO<br>(n=6)             |
| Body weight (g)                                         | 25,9±0,7    | 26,6±0,9                     | 29,5±0,3 <sup>##&amp;</sup>            | 28,4±0,7 <sup>#</sup>                          | 32±0,6 <sup>###&amp;&amp;&amp;</sup>   | 30,2±1,1 <sup>##&amp;</sup>   |
| Food consumption<br>(g/day/animal)                      | 3,1±0,2     | 3,2±0,1                      | 8,1±0,1 <sup>###&amp;&amp;&amp;</sup>  | <b>6,2±0,2<sup>***###&amp;&amp;&amp;</sup></b> | 2,6±0,1 <sup>###&amp;&amp;&amp;</sup>  | <b>2,9±0,1<sup>**</sup></b>   |
| Tibia length (mm)                                       | 17,2±0,04   | 17,1±0,2                     | 17,4±0,04                              | 17,1±0,04                                      | 17,6±0,04 <sup>##&amp;</sup>           | 17,3±0,1                      |
| <b>Tissue weight</b><br>(mg of tissue/tibia length, mm) |             |                              |                                        |                                                |                                        |                               |
| iBAT                                                    | 3,5±0,2     | 3,4±0,2                      | 6,6±0,3 <sup>###&amp;&amp;&amp;</sup>  | 6±0,2 <sup>###&amp;&amp;&amp;</sup>            | 5,5±0,6 <sup>###&amp;&amp;&amp;</sup>  | <b>3,2±0,3<sup>***</sup></b>  |
| eWAT                                                    | 20,1±1,03   | 23,2±1,5                     | 12,5±1,1 <sup>###&amp;&amp;&amp;</sup> | <b>19,3±1,2<sup>**</sup></b>                   | 40,9±5,6 <sup>###&amp;&amp;&amp;</sup> | <b>20,3±2,6<sup>***</sup></b> |
| iWAT                                                    | 11,9±1,6    | 12,1±0,5                     | 9,4±0,4                                | <b>11,8±0,7<sup>*</sup></b>                    | 21,2±2,2 <sup>###&amp;</sup>           | <b>13,1±1,4<sup>**</sup></b>  |
| mWAT                                                    | 9,3±1,1     | 10,7±1,1                     | 5,6±0,5 <sup>##&amp;&amp;</sup>        | <b>8,5±1,1<sup>*</sup></b>                     | 15,6±1,9 <sup>#</sup>                  | <b>7,3±0,7<sup>***</sup></b>  |
| Liver                                                   | 62,7±3      | <b>74,9±2,1<sup>**</sup></b> | 90,9±1,4 <sup>###&amp;&amp;&amp;</sup> | 85,7±2,7 <sup>###&amp;</sup>                   | 77,3±3,5 <sup>#</sup>                  | 77±5,5 <sup>#</sup>           |
| Heart                                                   | 7,3±0,5     | 7,3±0,2                      | 11±0,3 <sup>###&amp;&amp;&amp;</sup>   | 10,5±0,3 <sup>###&amp;&amp;&amp;</sup>         | 7,5±0,3                                | 8,2±0,4                       |
| <b>Circulating parameters</b>                           |             |                              |                                        |                                                |                                        |                               |
| Glucose (mg/dl)                                         | 157±8,4     | 182±7,6                      | 152±3,2                                | <b>185±6,2<sup>*</sup></b>                     | 154±3,6                                | 166±8,6                       |
| Triglycerides (mg/dl)                                   | 195±10,7    | 200±11,2                     | 223±8,1                                | 200±19,2                                       | 246±11,7                               | 208±15                        |
| Insulin (pg/ml)                                         | 751±120,5   | 835±97,7                     | 708±119,6                              | 603±122,8                                      | 801±159,3                              | 754±130,9                     |
| Leptin (pg/ml)                                          | 1912±309,6  | 1846±383,6                   | <b>1116±89,3<sup>#</sup></b>           | 1646±264,4                                     | 2565±782,3                             | <b>637±95,7<sup>*</sup></b>   |
| PAI1 total (pg/ml)                                      | 450±119,6   | 943±232,5                    | 1606±507,8                             | 1075±134,9                                     | 698±99,6                               | 1808±606,7 <sup>#</sup>       |
| Resistin (pg/ml)                                        | 913±42,4    | 1127±135,9                   | 1010±87,2                              | 851±68,2                                       | 450±90,8 <sup>###&amp;&amp;&amp;</sup> | 601±48 <sup>&amp;&amp;</sup>  |
| Il-6 (pg/ml)                                            | ND          | ND                           | ND                                     | ND                                             | 28,3±16,4                              | 85,1±43,4                     |
| TNF-α (pg/ml)                                           | ND          | ND                           | ND                                     | ND                                             | 22,7±6,6                               | 10,3±1,4                      |
| Mcp-1 (pg/ml)                                           | ND          | ND                           | ND                                     | ND                                             | 52,5±18,2                              | 69,9±22,2                     |
| Adiponectin (μg/ml)                                     | 61,9±6,4    | 44,4±6,5                     | 39,1±7,6                               | 53,3±5,2                                       | 56,3±1,5                               | <b>42±4,1<sup>*</sup></b>     |

12 weeks old mice were exposed to cold (4°C) or thermoneutrality (30°C) for 1 week. iBAT, interscapular BAT; iWAT, inguinal WAT; eWAT, epididymal WAT; mWAT, mesenteric WAT; ND, not-detectable. All measurements are means ± s.e.m. Data were analyzed by one-way ANOVA (\*P<0.05, \*\*P<0.01 and \*\*\*P<0.001 when compared with its own CTL; #P<0.05, .##P<0.01 and ###P<0.001 when compared with WT 22°C; &P<0.05, &&P<0.01 and &&&P<0.001 when compared with B1B2R-KO 22°C).

**Supplementary table 4: Transcript expression in iBAT from B1B2R-KO mice.**

|                                          | 22°C     |                            | 4°C                                     |                                         | 30°C                                     |                                              |
|------------------------------------------|----------|----------------------------|-----------------------------------------|-----------------------------------------|------------------------------------------|----------------------------------------------|
|                                          | WT (n=5) | B1B2R-KO (n=5)             | WT (n=5)                                | B1B2R-KO (n=5)                          | WT (n=5)                                 | B1B2R-KO (n=5)                               |
| <b>Thermogenesis</b>                     |          |                            |                                         |                                         |                                          |                                              |
| <i>Ucp1</i>                              | 1±0,1    | 1±0,3                      | 2,3±0,2 <sup>####&amp;&amp;&amp;</sup>  | 2,4±0,2 <sup>####&amp;&amp;&amp;</sup>  | 1,04±0,1                                 | 3,7±0,8 <sup>##&amp;&amp;</sup>              |
| <i>Dio2</i>                              | 1±0,2    | 2±0,6                      | 3,6±0,9 <sup>#</sup>                    | 2,7±0,4                                 | 1,5±0,3                                  | 3,3±1,8                                      |
| <i>Prdm16</i>                            | 1±0,2    | 0,9±0,2                    | 0,5±0,03 <sup>#</sup>                   | 0,7±0,1                                 | 2,3±0,2 <sup>##&amp;&amp;</sup>          | 3,1±0,3 <sup>####&amp;&amp;&amp;</sup>       |
| <i>Pgc1a</i>                             | 1±0,2    | 1,9±0,5                    | 1,4±0,3                                 | 1,3±0,2                                 | 3,2±0,3 <sup>###</sup>                   | 3,3±0,5 <sup>##</sup>                        |
| <i>Cidea</i>                             | 1±0,3    | 0,7±0,1                    | 0,6±0,1                                 | 0,4±0,04                                | 1,8±0,1 <sup>&amp;&amp;</sup>            | <b>2,6±0,2<sup>####&amp;&amp;&amp;</sup></b> |
| <i>Cebpb</i>                             | 1±0,3    | 0,6±0,2                    | 1,7±0,6                                 | 0,6±0,1                                 | 1,2±0,5                                  | 2,5±1,8                                      |
| <i>Leptin</i>                            | 1±0,3    | 1±0,2                      | 0,7±0,2                                 | 0,5±0,1                                 | 16,3±2,04 <sup>####&amp;&amp;&amp;</sup> | <b>6,04±1,6<sup>***</sup></b>                |
| <i>Knq2 HMWK</i>                         | 1±0,2    | 0,5±0,1                    | 1,4±0,3                                 | 2,3±0,5 <sup>##&amp;&amp;</sup>         | 1,1±0,2                                  | 0,9±0,2                                      |
| <i>Knq2 LMWK</i>                         | 1±0,1    | 1,1±0,1                    | 3,1±0,5 <sup>####&amp;&amp;&amp;</sup>  | 3,6±0,2 <sup>####&amp;&amp;&amp;</sup>  | 1,9±0,1 <sup>####&amp;&amp;&amp;</sup>   | <b>1,2±0,2<sup>*#</sup></b>                  |
| <b>Fatty acid and glucose metabolism</b> |          |                            |                                         |                                         |                                          |                                              |
| <i>Lpl</i>                               | 1±0,1    | 0,8±0,1                    | 1,1±0,1                                 | 1,1±0,1                                 |                                          |                                              |
| <i>Fabp4</i>                             | 1±0,1    | 0,9±0,1                    | 0,9±0,2                                 | 0,8±0,02                                |                                          |                                              |
| <i>Fas</i>                               | 1±0,2    | 0,7±0,1                    | 0,8±0,3                                 | 0,8±0,1                                 |                                          |                                              |
| <i>Cd36</i>                              | 1±0,2    | 1,2±0,2                    | 1,2±0,4                                 | 1,1±0,1                                 |                                          |                                              |
| <i>Dgat</i>                              | 1±0,2    | 0,8±0,2                    | 1±0,4                                   | 1±0,1                                   |                                          |                                              |
| <i>Lcad</i>                              | 1±0,2    | 0,8±0,1                    | 0,9±0,2                                 | 0,9±0,1                                 |                                          |                                              |
| <i>Acox1</i>                             | 1±0,1    | 0,8±0,1                    | 0,8±0,1                                 | 1,1±0,1                                 |                                          |                                              |
| <i>Glut1</i>                             | 1±0,1    | 0,8±0,1                    | 0,9±0,1                                 | 0,7±0,1                                 |                                          |                                              |
| <i>Glut4</i>                             | 1±0,1    | <b>0,7±0,1<sup>*</sup></b> | 0,8±0,2                                 | 0,7±0,1                                 |                                          |                                              |
| <b>Angiogenesis</b>                      |          |                            |                                         |                                         |                                          |                                              |
| <i>Angiopt1</i>                          | 1±0,2    | 1,2±0,1                    | 0,2±0,02 <sup>####&amp;&amp;&amp;</sup> | 0,2±0,01 <sup>####&amp;&amp;&amp;</sup> |                                          |                                              |
| <i>Cd31</i>                              | 1±0,1    | 0,8±0,1                    | 0,9±0,1                                 | 0,8±0,1                                 |                                          |                                              |
| <i>Flt1</i>                              | 1±0,1    | 1±0,1                      | 0,7±0,1                                 | 0,6±0,1 <sup>#</sup>                    |                                          |                                              |
| <i>Kdr</i>                               | 1±0,2    | 0,9±0,1                    | 0,9±0,1                                 | 0,7±0,1                                 |                                          |                                              |
| <i>Vegfa</i>                             | 1±0,2    | 0,8±0,1                    | 0,8±0,1                                 | 0,8±0,1                                 |                                          |                                              |
| <b>Immune</b>                            |          |                            |                                         |                                         |                                          |                                              |
| <i>Tnf</i>                               | 1±0,2    | 1,1±0,03                   | 1,3±0,2                                 | 1,2±0,1                                 |                                          |                                              |
| <i>Nos2</i>                              | 1±0,2    | 0,7±0,1                    | 0,4±0,1 <sup>##</sup>                   | 0,4±0,1 <sup>##</sup>                   |                                          |                                              |
| <i>Ccl2</i>                              | 1±0,2    | 3,4±1,6                    | 3,1±0,7                                 | 2,2±0,1                                 |                                          |                                              |
| <i>Il6</i>                               | 1±0,1    | 1,4±0,2                    | 1,9±0,6                                 | 1,1±0,1                                 |                                          |                                              |
| <i>Arg1</i>                              | 1±0,3    | 5,7±2,8                    | 3±2,2                                   | 8,6±6,3                                 |                                          |                                              |
| <i>Mrc1</i>                              | 1±0,1    | 1,1±0,1                    | 1,2±0,3                                 | 0,8±0,1                                 |                                          |                                              |
| <i>Clec10a</i>                           | 1±0,1    | 1,1±0,1                    | 1,8±0,6                                 | 0,7±0,1                                 |                                          |                                              |

12 weeks old mice were exposed to cold (4°C) or thermoneutrality (30°C) for 1 week. All measurements are means ± s.e.m. Data were analyzed by one-way ANOVA (\*P<0.05 and \*\*\*P<0.001 when compared with its own CTL; #P<0.05, .##P<0.01 and ###P<0.001 when compared with WT 22°C; &&P<0.01 and &&&P<0.001 when compared with B1B2R-KO 22°C).

**Supplementary table 5: Transcript expression in iWAT from B1B2R-KO mice.**

|                                          | 22°C     |                | 4°C                                   |                                  | 30°C                            |                                  |
|------------------------------------------|----------|----------------|---------------------------------------|----------------------------------|---------------------------------|----------------------------------|
|                                          | WT (n=5) | B1B2R-KO (n=5) | WT (n=5)                              | B1B2R-KO (n=5)                   | WT (n=4)                        | B1B2R-KO (n=5)                   |
| <b>Thermogenesis</b>                     |          |                |                                       |                                  |                                 |                                  |
| <i>Ucp1</i>                              | 1±0,4    | 1,6±1,1        | 73,3±25,3 <sup>#&amp;</sup>           | 45,3±19,6                        | 0,01±0,01                       | 0,04±0,02                        |
| <i>Dio2</i>                              | 1±0,4    | 1,2±0,8        | 21±6,1 <sup>##&amp;</sup>             | <b>7,7±2,2*</b>                  | 0,1±0,01                        | 0,5±0,2                          |
| <i>Prdm16</i>                            | 1±0,2    | 0,7±0,1        | 0,8±0,1                               | 1,1±0,1                          | 1,3±0,4                         | 0,8±0,1                          |
| <i>Pgc1a</i>                             | 1±0,2    | 0,9±0,3        | 2,2±0,4 <sup>#&amp;</sup>             | 2,5±0,2 <sup>#&amp;&amp;</sup>   | 1,03±0,3                        | 0,7±0,1                          |
| <i>Cidea</i>                             | 1±0,4    | 0,9±0,2        | 3,6±0,9 <sup>&amp;</sup>              | 2,3±0,8                          | 0,1±0,01                        | 0,2±0,1                          |
| <i>Cebpb</i>                             | 1±0,4    | 0,4±0,2        | 4,4±0,6 <sup>###&amp;&amp;&amp;</sup> | <b>0,7±0,2***</b>                | 0,5±0,1                         | 0,3±0,1                          |
| <i>Leptin</i>                            | 1±0,2    | 0,6±0,2        | 0,6±0,1                               | 1,2±0,5                          | 1,4±0,7                         | 0,2±0,1                          |
| <i>Adipoq</i>                            | 1±0,2    | 0,7±0,2        | 0,5±0,1                               | 0,6±0,2                          | 0,8±0,3                         | 0,4±0,1                          |
| <i>Kn2 HMWK</i>                          | 1±0,4    | 1,8±0,4        | 4,6±1,3 <sup>#</sup>                  | 2,8±0,3                          | 8,3±3,8                         | 39,8±24                          |
| <i>Kn2 LMWK</i>                          | 1±0,4    | 1,3±0,4        | 66,7±29 <sup>#&amp;</sup>             | 9,4±3,3                          | 1,4±1                           | 0,2±0,1                          |
| <b>Fatty acid and glucose metabolism</b> |          |                |                                       |                                  |                                 |                                  |
| <i>Lpl</i>                               | 1±0,2    | 0,7±0,2        | 1,1±0,3                               | 1,1±0,2                          | 1,1±0,5                         | 0,7±0,09                         |
| <i>Fabp4</i>                             | 1±0,2    | 1±0,2          | 1,2±0,2                               | 1,5±0,3                          | 0,9±0,3                         | 0,5±0,1                          |
| <i>Fas</i>                               | 1±0,3    | 0,9±0,2        | 2,2±0,4 <sup>#&amp;</sup>             | 2±0,3                            | 0,3±0,1                         | 0,7±0,2                          |
| <i>Cd36</i>                              | 1±0,2    | 1±0,2          | 0,8±0,2                               | 1,1±0,2                          | 2,1±0,8                         | 1,2±0,2                          |
| <i>Mcad</i>                              | 1±0,2    | 0,7±0,1        | 2,3±0,4 <sup>#&amp;&amp;</sup>        | 2,3±0,2 <sup>#&amp;&amp;</sup>   | 0,8±0,3                         | 0,6±0,1                          |
| <i>Lcad</i>                              | 1±0,1    | 1±0,2          | 3,2±0,6 <sup>###&amp;&amp;</sup>      | 3,2±0,4 <sup>###&amp;&amp;</sup> | 0,6±0,1                         | 0,6±0,1                          |
| <i>Acox1</i>                             | 1±0,2    | 1±0,2          | 1,7±0,4                               | 1,9±0,3                          | 0,8±0,3                         | 0,5±0,1                          |
| <i>Glut1</i>                             | 1±0,2    | 0,9±0,2        | 0,8±0,2                               | 0,9±0,3                          | 0,6±0,1                         | 0,8±0,1                          |
| <i>Glut4</i>                             | 1±0,1    | 1±0,2          | 2,5±0,4 <sup>#&amp;</sup>             | 2,2±0,3                          | 1,3±0,5                         | 1,1±0,3                          |
| <b>Angiogenesis</b>                      |          |                |                                       |                                  |                                 |                                  |
| <i>Angiopt1</i>                          | 1±0,4    | 0,4±0,1        | 0,5±0,1                               | 0,7±0,2                          | 2,2±0,8 <sup>&amp;</sup>        | 1,5±0,3                          |
| <i>Cd31</i>                              | 1±0,2    | 0,6±0,1        | 0,5±0,1                               | 0,8±0,1                          | 1,8±0,1 <sup>##&amp;&amp;</sup> | 1,9±0,1 <sup>##&amp;&amp;</sup>  |
| <i>Flt1</i>                              | 1±0,3    | 0,6±0,1        | 0,4±0,1                               | 0,6±0,2                          | 1,4±0,5                         | 1,4±0,2                          |
| <i>Kdr</i>                               | 1±0,2    | 0,7±0,2        | 0,7±0,2                               | 0,9±0,2                          | 0,7±0,2                         | 0,5±0,04                         |
| <i>Vegfa</i>                             | 1±0,4    | 1,1±0,3        | 0,6±0,1                               | 1,1±0,3                          | 1,3±0,5                         | 0,9±0,1                          |
| <b>Immune</b>                            |          |                |                                       |                                  |                                 |                                  |
| <i>Tnf</i>                               | 1±0,7    | 1,2±0,6        | 0,4±0,2                               | 0,7±0,5                          | 2,5±0,9                         | 3,2±0,5                          |
| <i>Nos2</i>                              | 1±0,3    | 0,7±0,2        | 0,5±0,1                               | 0,8±0,3                          | 1±0,1                           | 0,6±0,1                          |
| <i>Ccl2</i>                              | 1±0,5    | 3,3±1,2        | 1,1±0,5                               | 0,8±0,3                          | 2±0,2                           | 4,1±0,9                          |
| <i>Il6</i>                               | 1±0,4    | 1,4±0,5        | 0,7±0,3                               | 0,9±0,3                          | 3±0,5                           | 5,3±0,9 <sup>###&amp;&amp;</sup> |
| <i>Arg1</i>                              | 1±0,3    | 10,1±7,6       | 2,7±2,1                               | 0,9±0,3                          | 0,4±0,1                         | 3±1,2                            |
| <i>Mrc1</i>                              | 1±0,2    | 1,5±0,5        | 0,3±0,1                               | 0,7±0,3                          | 1,7±0,4                         | 2,8±0,5 <sup>#</sup>             |
| <i>Clec10a</i>                           | 1±0,2    | 1,1±0,2        | 0,4±0,1                               | 0,8±0,3                          | 2,1±0,4                         | 3,2±0,6 <sup>###&amp;&amp;</sup> |

12 weeks old mice were exposed to cold (4°C) or thermoneutrality (30°C) for 1 week. All measurements are means ± s.e.m. Data were analyzed by one-way ANOVA (\*P<0.05 and \*\*\*P<0.001 when compared with its own CTL; #P<0.05, ##P<0.01 and ###P<0.001 when compared with WT 22°C; &P<0.05, &&P<0.01 and &&&P<0.001 when compared with B1B2R-KO 22°C).
